# Supplementary material
Source: ML conference proceedings conference paper supplement (https://openreview.net/forum?id=ukXJIhQaR5)
Supplement: supplementary_material [file File1-Ethical review approval certificate.pdf › Supplementary Material for ClinicalLab/File1-Ethical review approval certificate.pdf]

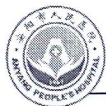

# 安阳市人民医院

## 医学伦理委员会伦理审查批件

|                                                                                                                                                                                                                                                                                                                                                                                                                                                                                                                                                                                                         |                                                                                         |         |                 |
|---------------------------------------------------------------------------------------------------------------------------------------------------------------------------------------------------------------------------------------------------------------------------------------------------------------------------------------------------------------------------------------------------------------------------------------------------------------------------------------------------------------------------------------------------------------------------------------------------------|-----------------------------------------------------------------------------------------|---------|-----------------|
| 伦理审查编号                                                                                                                                                                                                                                                                                                                                                                                                                                                                                                                                                                                                  | KS-2024-05-15                                                                           | 伦理存档档案号 | LW2024-021      |
| 名称                                                                                                                                                                                                                                                                                                                                                                                                                                                                                                                                                                                                      | CliniLab: Aligning Agents for Multi-Departmental Clinical Diagnostics in the Real World |         |                 |
| 主要研究者                                                                                                                                                                                                                                                                                                                                                                                                                                                                                                                                                                                                   | Tengxiao Wu                                                                             | 研究科室    | 普外科             |
| 研究分类                                                                                                                                                                                                                                                                                                                                                                                                                                                                                                                                                                                                    | 科研和临床试验研究                                                                               |         |                 |
| 审查方式                                                                                                                                                                                                                                                                                                                                                                                                                                                                                                                                                                                                    | 快速审查                                                                                    | 审查日期    | 2024 年 5 月 15 日 |
| 审查结果： 同意该研究项目在本院开展。                                                                                                                                                                                                                                                                                                                                                                                                                                                                                                                                                                                     |                                                                                         |         |                 |
| <p>审查意见：</p> <p>遵循卫计委《涉及人的生物医学研究伦理审查办法（试行）》（2016）、SFDA《药物临床试验质量管理规范》（2003）、《医疗器械临床试验规定》（2004）、WMA《赫尔辛基宣言》和 CIOMS《人体生物医学研究国际道德指南》的伦理原则，经本伦理委员会审查，同意按所批准的临床研究方案、知情同意书、招募材料开展本项研究，并在研究过程中，最大程度地保护受试者的健康与权益。</p> <p>在研究过程中，若变更主要研究者，对临床研究方案、知情同意书等的任何修改，请申请人提交修正案审查申请。</p> <p>发生严重不良事件，请申请人及时提交严重不良事件报告。</p> <p>请按照伦理委员会规定的年度/定期跟踪审查频率，申请人在截止日期前 1 个月提交研究进展报告；当出现任何可能显著影响研究进行或增加受试者危险的情况时，请申请人及时向伦委会提交书面报告。</p> <p>试验纳入了不符合纳入标准或符合排除标准的受试者，符合终止试验规定而未让受试者退出试验，给予错误治疗或剂量，给予方案禁止的合并用药等没有遵从方案开展研究的情况；或可能对受试者的权益/健康、以及研究的科学性造成不良影响等违背伦理原则与规范的情况，请申办者/监察员/研究者提交违背方案报告。</p> <p>申请人暂停或提前终止临床研究，请及时提交暂停/终止研究报告。</p> |                                                                                         |         |                 |

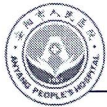

|                                                                                                                                             |       |        |                 |
|---------------------------------------------------------------------------------------------------------------------------------------------|-------|--------|-----------------|
| 完成临床研究，请申请人提交研究完成报告。                                                                                                                        |       |        |                 |
| 定期跟踪审查频率                                                                                                                                    | 12 个月 | 批件有效期至 | 2025 年 5 月 15 日 |
| 说明：研究需按照伦理委员会审查批准的方案和知情同意书进行。获得批件后在有效期内未启动或启动后未入组受试者，批件自动作废。                                                                                |       |        |                 |
| <div>安阳市人民医院伦理委员会（盖章）：</div> <div>日期：2024年 5 月 15 日</div> |       |        |                 |
